# Supplementary material for: Whom to Groom and for What? Patterns of Grooming in Female Barbary Macaques (Macaca sylvanus)
Source: PLoS One. 2015 Feb 10;10(2):e0117298. doi: 10.1371/journal.pone.0117298 (PMC4323340; doi:10.1371/journal.pone.0117298)
Supplement: S7 Table — (XLS) [file pone.0117298.s007.xls]

## Sheet: List1
TABLE S7. Friendship matrix based on time spent in contact (data season 1)
	athene	makeup	emily	sandy	livia	mercedes	princess	artemis	lea	tris	posh	punta	blondini	april	artist	sophie	ruth
athene		0	12.9017	0.687143	0.685778	0	1.03483	0	0	0	0	0	0	0.690579	0	0	0
makeup	0		7.0262	1.36764	0.545948	4.85943	0	0	1.37601	0	0	0	0.548725	0	0	0.276047	0
emily	6.13492	4.27749		1.6419	1.96634	0	1.15394	0	0	0	0	0	0.329368	0	0.496042	0	0
sandy	0.562589	1.43358	2.82701		2.28445	0	7.18245	1.42204	0.287883	0	0	0	0	0	0	0	0
livia	1.26697	1.29134	7.63978	5.15492		0	0.64698	0	0	0	0	0	0	0	0	0	0
mercedes	0	5.87632	0	0	0		0	0	0	0	4.29561	0	0	1.96467	0	0	3.8634
princess	1.2797	0	3.00095	10.8484	0.433054	0		0	0	0	0	0	0	0	0	0.43794	0
artemis	0	0	0	1.54649	0	0	0		0	0	0	0	0	4.97378	0.311491	0	9.16824
lea	0	3.65457	0	0.729425	0	0	0	0		2.17719	0	6.49864	0.73166	0	0	2.20852	0
tris	0	0	0	0	0	0	0	0	0.675247		6.58073	0.664475	0	7.19535	0	0	0.884204
posh	0	0	0	0	0	3.27165	0	0	0	7.35793		0	0	4.35778	0.25687	0	0.755762
punta	0	0	0	0	0	0	0	0	0	1.31902	0		3.54567	0	0	7.13436	0
blondini	0	2.30436	2.27201	0	0	0	0	0	1.15689	0	0	9.10629		0	0	1.16045	0
april	0.437367	0	0	0	0	1.31737	0	3.53785	0	5.75483	3.83655	0	0		0.896244	0	0.219782
artist	0	0	2.97688	0	0	0	0	0.998327	0	0	1.01897	0	0	4.03831		1.01373	5.95377
sophie	0	0	0	0	0	0	0.70238	0	2.11147	0	0	11.079	0.70166	0	0.704548		0
ruth	0	0	0	0	0	3.40054	0	8.5605	0	1.14254	0.873414	0	0	0.288504	1.73451	0
Females are ordered according to the social hierarchy based on normalised David`s score in season 1
